# Supplementary material for: Micro- and nanostructured layered-kagome zinc orthovanadate BaZn3(VO4)2(OH)2
Source: Royal Society of Chemistry journal article supplement (doi:10.1039/d3dt03117a), 2023-01-01
Supplement: d3dt03117a1.pdf [file d3dt03117a1.pdf]

## Electronic Supplementary Information

### Micro- and nanostructured layered-kagome zinc orthovanadate $\text{BaZn}_3(\text{VO}_4)_2(\text{OH})_2$

Bachchar Hadrane, Philippe Deniard, Nicolas Gautier, Michael Paris, Christophe Payen\* and Rémi Dessapt\*

*Nantes Université, CNRS, Institut des Matériaux de Nantes Jean Rouxel, IMN, F-44000 Nantes*

#### Table of contents:

|                                                                                                                                                                                                                                                                                                                                                                                |    |
|--------------------------------------------------------------------------------------------------------------------------------------------------------------------------------------------------------------------------------------------------------------------------------------------------------------------------------------------------------------------------------|----|
| <b>Figure S1.</b> Portion of the Rietveld refinement plot for $\text{Zn}_3\text{V}_2\text{O}_7(\text{OH})_2 \cdot 2\text{H}_2\text{O}$ showing observed, calculated and difference patterns. Data were taken and refined from $2\theta = 10^\circ$ to $2\theta = 90^\circ$ .....                                                                                               | 2  |
| <b>Table S1.</b> Structural parameters, crystallite size, and final agreement factors for $\text{Zn}_3\text{V}_2\text{O}_7(\text{OH})_2 \cdot 2\text{H}_2\text{O}$ derived from our Rietveld refinement. ....                                                                                                                                                                  | 3  |
| <b>Figure S2.</b> SEM image of $\text{Zn}_3\text{V}_2\text{O}_7(\text{OH})_2 \cdot 2\text{H}_2\text{O}$ . ....                                                                                                                                                                                                                                                                 | 3  |
| <b>Figure S3.</b> Rietveld refinement plot for <b>BaZn<sub>3</sub> NPs-25min</b> showing observed, calculated and difference patterns. ....                                                                                                                                                                                                                                    | 4  |
| <b>Table S2.</b> Structural parameters, crystallite sizes, and final agreement factors for <b>BaZn<sub>3</sub> NPs-7h</b> . ....                                                                                                                                                                                                                                               | 5  |
| <b>Table S3.</b> Structural parameters, crystallite sizes, and final agreement factors for <b>BaZn<sub>3</sub> NPs-25 min</b> . ....                                                                                                                                                                                                                                           | 6  |
| <b>Table S4.</b> Main M-O (M = Ba, Zn, and V) bond distances (Å) and O-V-O angles for <b>BaZn<sub>3</sub> MPs, BaZn<sub>3</sub> NPs-7h and BaZn<sub>3</sub> NPs-25min</b> .....                                                                                                                                                                                                | 6  |
| <b>Figure S4.</b> Ball and stick model showing $\text{MO}_x$ polyhedra (M = Ba, Zn, and V) in the crystal structure of $\text{BaZn}_3(\text{VO}_4)_2(\text{OH})_2$ . The six long Ba—O1 distances are not visualized for the sake of clarity. ....                                                                                                                             | 7  |
| <b>Figure S5.</b> SEM-EDS spectrum acquired on <b>BaZn<sub>3</sub> MPs</b> . ....                                                                                                                                                                                                                                                                                              | 8  |
| <b>Figure S6.</b> (a, b) TEM images of representative <b>BaZn<sub>3</sub> NPs-25min</b> at different magnifications. Reticular planes are visible in (b). (c, d) FFT diffraction pattern along the [2-51] zone axis from the region marked out by the white rectangle in (c). Global indexing in (d) was obtained using the structural model deduced from XRD (Table S3). .... | 9  |
| <b>Figure S7.</b> (a) EDS spectrum of the chosen particle of <b>BaZn<sub>3</sub> NPs-7h</b> displayed in (b). (c,d,e) EDS mapping analysis of Ba, Zn and V elements, respectively. ....                                                                                                                                                                                        | 10 |
| <b>Figure S8.</b> (a) EDS spectrum of the chosen particle of <b>BaZn<sub>3</sub> NPs-25min</b> displayed in (b). (c,d,e) EDS mapping analysis of Ba, Zn and V elements, respectively. ....                                                                                                                                                                                     | 11 |

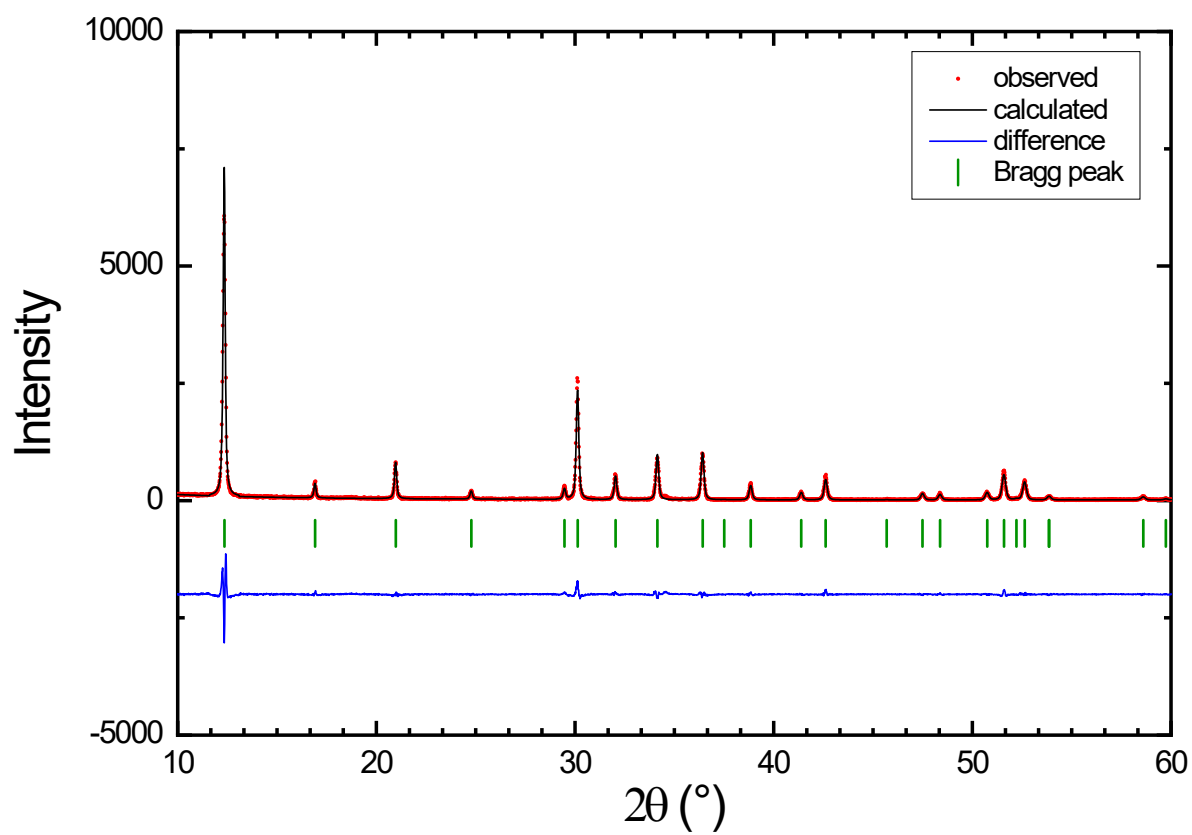

**Figure S1.** Portion of the Rietveld refinement plot for  $\text{Zn}_3\text{V}_2\text{O}_7(\text{OH})_2 \cdot 2\text{H}_2\text{O}$  showing observed, calculated and difference patterns. Data were taken and refined from  $2\theta = 10^\circ$  to  $2\theta = 90^\circ$ .

**Table S1.** Structural parameters, crystallite size, and final agreement factors for  $\text{Zn}_3\text{V}_2\text{O}_7(\text{OH})_2 \cdot 2\text{H}_2\text{O}$  derived from our Rietveld refinement.

| S.G ( $P3m$ ): $a$ (Å) = 6.0698(2), $c$ (Å) = 7.1986(5), Cryst. Size = 109(2) nm |            |          |           |       |                                          |
|----------------------------------------------------------------------------------|------------|----------|-----------|-------|------------------------------------------|
| Atom                                                                             | x          | y        | z         | SOF   | $U_{\text{iso}}$ Equiv (Å <sup>2</sup> ) |
| Zn <sub>1</sub>                                                                  | 1/2        | 0        | 0         | 1     | 0.031(2)                                 |
| V <sub>1</sub>                                                                   | 0          | 0        | 0.2506(8) | 1     | 0.019(2)                                 |
| O <sub>1</sub>                                                                   | 2/3        | 1/3      | 0.878(3)  | 1     | 0.023(4)                                 |
| O <sub>2</sub>                                                                   | 0.1533(13) | 0.307(3) | 0.826 (2) | 1     | 0.023                                    |
| O <sub>3</sub>                                                                   | 0          | 0        | 1/2       | 1     | 0.023                                    |
| O <sub>4</sub>                                                                   | 0.733(6)   | 0.367(3) | 0.498(11) | 0.333 | 0.023                                    |
| H <sub>1</sub>                                                                   | 2/3        | 1/3      | 0.75*     | 1     | 0.07599*                                 |
| GOF = 1.4, Rwp = 15.73, and Rp = 11.73                                           |            |          |           |       |                                          |

\*not refined

ADP harmonic parameters

| Aniso. ADP (Å <sup>2</sup> ) | $U_{11}$ | $U_{22}$ | $U_{33}$ | $U_{12}$ | $U_{13}$ | $U_{23}$ |
|------------------------------|----------|----------|----------|----------|----------|----------|
| Zn <sub>1</sub>              | 0.031(3) | 0.025(4) | 0.035(3) | 0.012(2) | 0.008(4) | 0.016(8) |
| V <sub>1</sub>               | 0.020(3) | 0.020    | 0.017(4) | 0.010(2) | 0        | 0        |

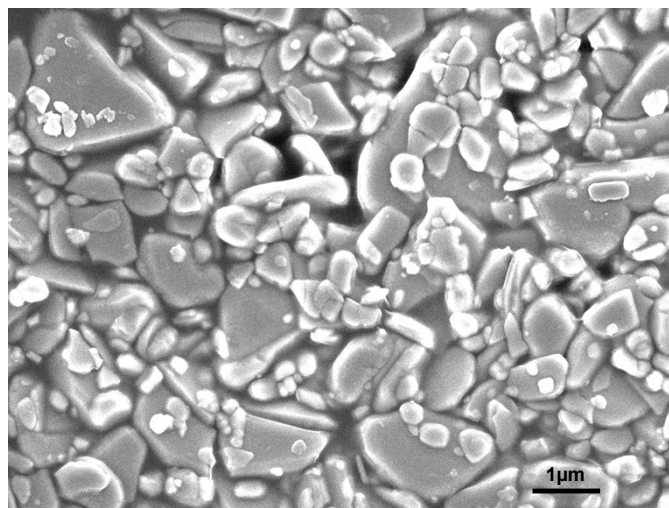

**Figure S2.** SEM image of  $\text{Zn}_3\text{V}_2\text{O}_7(\text{OH})_2 \cdot 2\text{H}_2\text{O}$ .

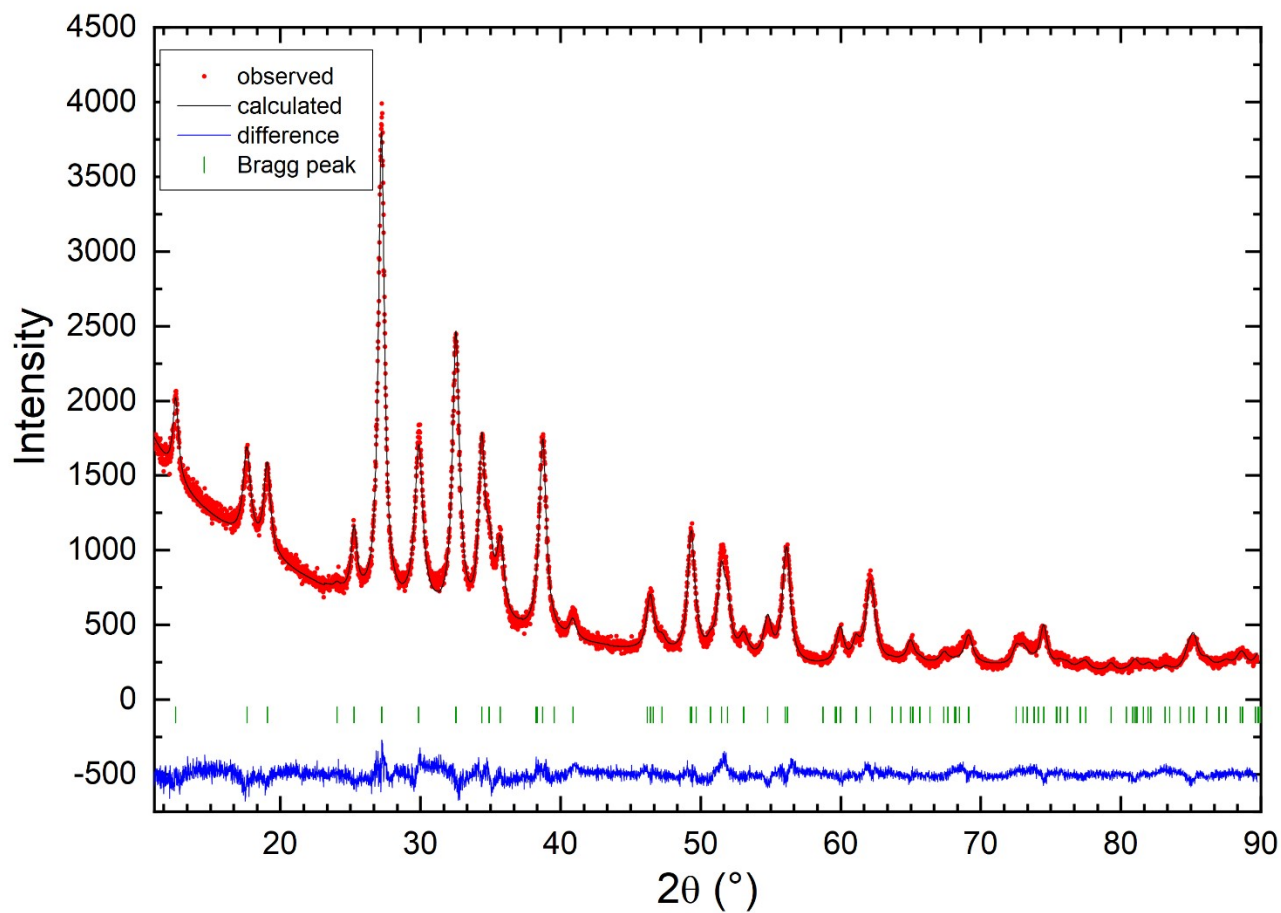

**Figure S3.** Rietveld refinement plot for **BaZn<sub>3</sub> NPs-25min** showing observed, calculated and difference patterns.

**Table S2.** Structural parameters, crystallite sizes, and final agreement factors for **BaZn<sub>3</sub> NPs-7h**.

| S.G ( $R\bar{3}m$ ): a (Å) = 5.9608(5), c (Å) = 21.062(2),<br>Cryst. Size = 26.0(8) nm // [001], 37(2) nm $\perp$ [001] |          |          |            |     |           |
|-------------------------------------------------------------------------------------------------------------------------|----------|----------|------------|-----|-----------|
|                                                                                                                         | x        | y        | z          | SOF | $U_{iso}$ |
| Ba <sub>1</sub>                                                                                                         | 2/3      | 1/3      | 5/6        | 1   | 0.042(3)  |
| Zn <sub>1</sub>                                                                                                         | 5/6      | 2/3      | 2/3        | 1   | 0.040(4)  |
| V <sub>1</sub>                                                                                                          | 1/3      | 2/3      | 0.7561(4)  | 1   | 0.011(4)  |
| O <sub>1</sub>                                                                                                          | 1/3      | 2/3      | 0.8347(12) | 1   | 0.007(4)  |
| O <sub>2</sub>                                                                                                          | 0.493(2) | 0.507(2) | 0.7322(6)  | 1   | 0.007     |
| O <sub>3</sub>                                                                                                          | 1        | 1        | 0.704(2)   | 1   | 0.007     |
| H <sub>1</sub>                                                                                                          | 1        | 1        | 0.7494*    | 1   | 0.008*    |
| GOF = 2.28, Rwp = 4.05, and Rp = 2.73                                                                                   |          |          |            |     |           |

\*not refined

## ADP harmonic parameters

|                 | $U_{11}$ | $U_{22}$ | $U_{33}$ | $U_{12}$ | $U_{13}$ | $U_{23}$ |
|-----------------|----------|----------|----------|----------|----------|----------|
| Ba <sub>1</sub> | 0.051(4) | 0.051    | 0.023(5) | 0.026(2) | 0        | 0        |
| Zn <sub>1</sub> | 0.044(4) | 0.053(5) | 0.026(6) | 0.027(2) | 0.004(2) | 0.008(4) |
| V <sub>1</sub>  | 0.005(4) | 0.005    | 0.023(7) | 0.003(2) | 0        | 0        |

**Table S3.** Structural parameters, crystallite sizes, and final agreement factors for **BaZn<sub>3</sub> NPs-25 min.**

| S.G ( $R\bar{3}m$ ): a (Å) = 5.9675(10), c (Å) = 21.100(4),<br>Cryst. Size = 13.1(4) nm // [001], 19.3(1) nm $\perp$ [001] |          |          |            |     |           |
|----------------------------------------------------------------------------------------------------------------------------|----------|----------|------------|-----|-----------|
|                                                                                                                            | x        | y        | z          | SOF | $U_{iso}$ |
| Ba <sub>1</sub>                                                                                                            | 2/3      | 1/3      | 5/6        | 1   | 0.069(4)  |
| Zn <sub>1</sub>                                                                                                            | 5/6      | 2/3      | 2/3        | 1   | 0.070(4)  |
| V <sub>1</sub>                                                                                                             | 1/3      | 2/3      | 0.7574(5)  | 1   | 0.016(4)  |
| O <sub>1</sub>                                                                                                             | 1/3      | 2/3      | 0.8411(13) | 1   | 0.019(4)  |
| O <sub>2</sub>                                                                                                             | 0.490(2) | 0.510(2) | 0.7324(7)  | 1   | 0.019     |
| O <sub>3</sub>                                                                                                             | 1        | 1        | 0.709(2)   | 1   | 0.019     |
| H <sub>1</sub>                                                                                                             | 1        | 1        | 0.7494*    | 1   | 0.008*    |
| GOF = 1.38, Rwp = 4.86, and Rp = 3.58                                                                                      |          |          |            |     |           |

\*not refined

ADP harmonic parameters

|                 | $U_{11}$ | $U_{22}$ | $U_{33}$ | $U_{12}$ | $U_{13}$ | $U_{23}$ |
|-----------------|----------|----------|----------|----------|----------|----------|
| Ba <sub>1</sub> | 0.094(6) | 0.094    | 0.021(6) | 0.047(3) | 0        | 0        |
| Zn <sub>1</sub> | 0.075(5) | 0.099(6) | 0.044(8) | 0.049(3) | 0.014(3) | 0.028(5) |
| V <sub>1</sub>  | 0.004(5) | 0.004    | 0.039(9) | 0.002(2) | 0        | 0        |

**Table S4.** Main M-O (M = Ba, Zn, and V) bond distances (Å) and O-V-O angles for **BaZn<sub>3</sub> MPs, BaZn<sub>3</sub> NPs-7h and BaZn<sub>3</sub> NPs-25min.**

| BaZn <sub>3</sub> MPs                                                                                                              | BaZn <sub>3</sub> NPs-25min                                                                                                        | BaZn <sub>3</sub> NPs-7h                                                                                                           |
|------------------------------------------------------------------------------------------------------------------------------------|------------------------------------------------------------------------------------------------------------------------------------|------------------------------------------------------------------------------------------------------------------------------------|
| Ba1—O2 (x 6): 2.811(10)<br>Ba1—O1 (x 4): 3.4488(3)<br>Ba1—O1 (x 2): 3.4488(2)<br>Mean: 3.13±0.02                                   | Ba1—O2 (x 6): 2.81(2)<br>Ba1—O1 (x 4): 3.449(2)<br>Ba1—O1 (x 2): 3.4492(14)<br>Mean: 3.13±0.03                                     | Ba1—O2 (x 6): 2.786(12)<br>Ba1—O1 (x 4): 3.4416(9)<br>Ba1—O1 (x 2): 3.4416(4)<br>Mean: 3.11±0.02                                   |
| Zn1—O2 (x 2): 2.233(8)<br>Zn1—O2 (x 2): 2.233(12)<br>Zn1—O3 (x 2): 1.948(11)<br>Mean: 2.14 ± 0.03                                  | Zn1—O2 (x 2): 2.26(2)<br>Zn1—O2 (x 2): 2.255(12)<br>Zn1—O3 (x 2): 1.94(2)<br>Mean: 2.15 ± 0.05                                     | Zn1—O2 (x 2): 2.235(10)<br>Zn1—O2 (x 2): 2.235(13)<br>Zn1—O3 (x 2): 1.893(13)<br>Mean: 2.12 ± 0.04                                 |
| V1—O1: 1.67(2)<br>V1—O2 (x 3): 1.706(11)<br>Mean: 1.70 ± 0.04<br>Angles:<br>O1—V1—O2 (x 3): 107.5(4)°<br>O2—V1—O2 (x 3): 111.4(6)° | V1—O1: 1.77(3)<br>V1—O2 (x 3): 1.701(14)<br>Mean: 1.72 ± 0.05<br>Angles:<br>O1—V1—O2 (x 3): 108.0(6)°<br>O2—V1—O2 (x 3): 110.9(7)° | V1—O1: 1.65(3)<br>V1—O2 (x 3): 1.722(11)<br>Mean: 1.70 ± 0.05<br>Angles:<br>O1—V1—O2 (x 3): 107.0(5)°<br>O2—V1—O2 (x 3): 111.8(5)° |

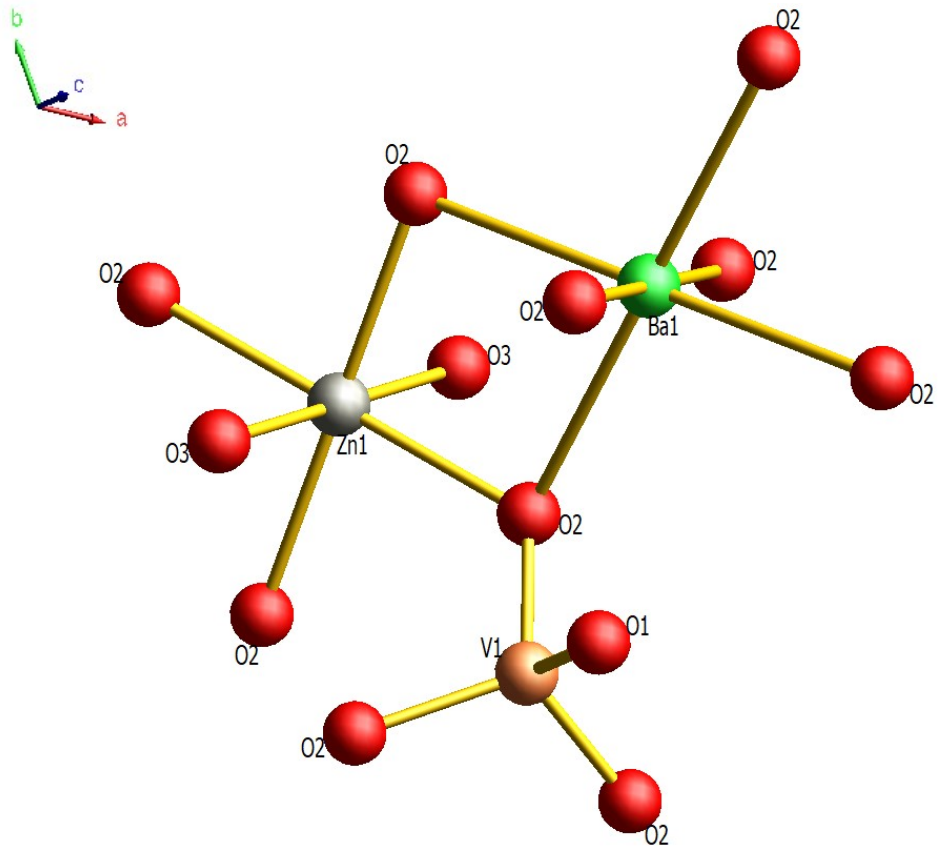

**Figure S4.** Ball and stick model showing  $\text{MO}_x$  polyhedra ( $M = \text{Ba}, \text{Zn}, \text{and V}$ ) in the crystal structure of  $\text{BaZn}_3(\text{VO}_4)_2(\text{OH})_2$ . The six long  $\text{Ba—O}$  distances are not visualized for the sake of clarity.

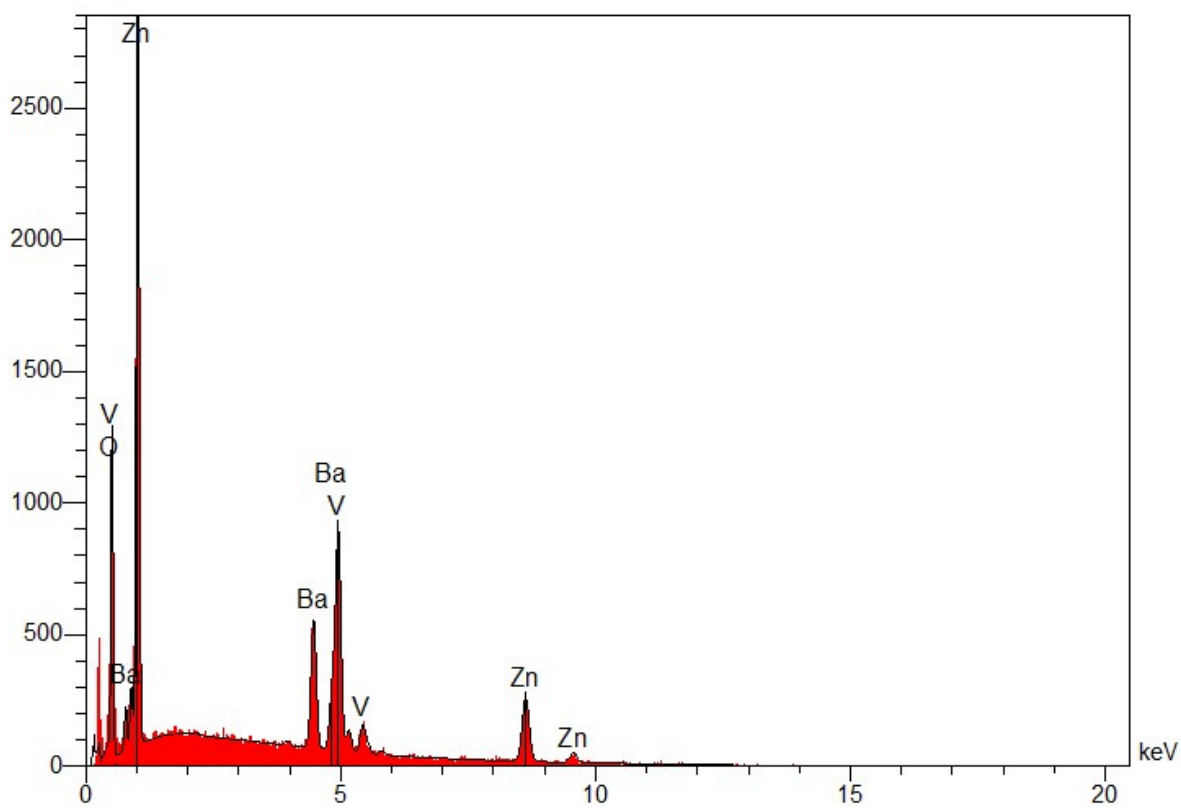

**Figure S5.** SEM-EDS spectrum acquired on  $\text{BaZn}_3$  MPs.



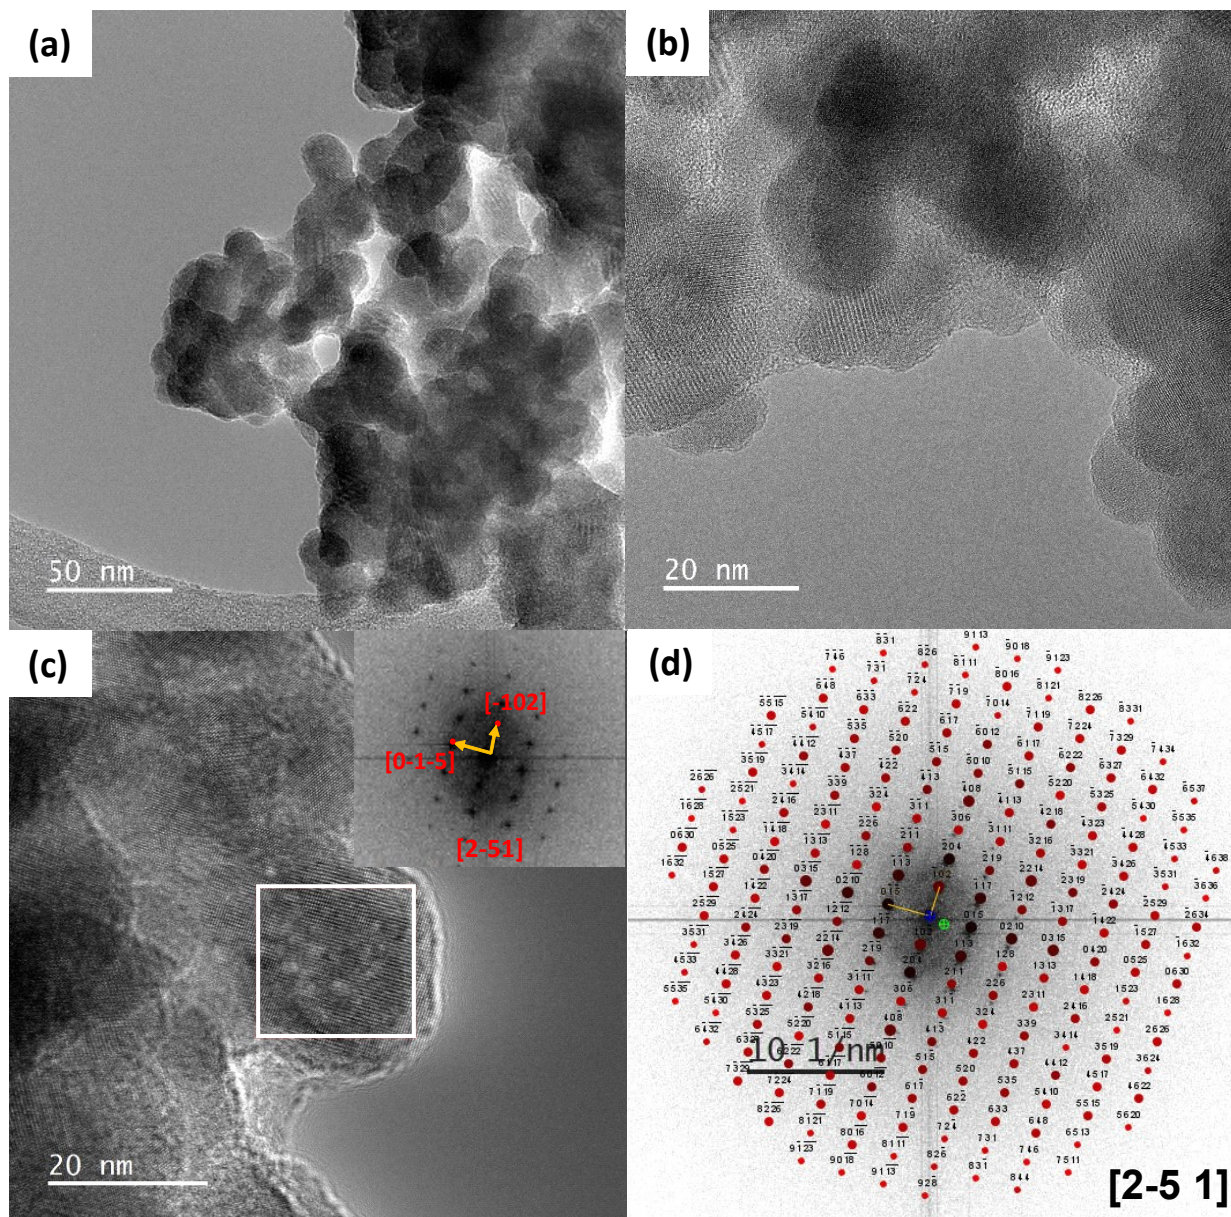

**Figure S6.** (a, b) TEM images of representative **BaZn<sub>3</sub> NPs-25min** at different magnifications. Reticular planes are visible in (b). (c, d) FFT diffraction pattern along the [2-51] zone axis from the region marked out by the white rectangle in (c). Global indexing in (d) was obtained using the structural model deduced from XRD (Table S3).

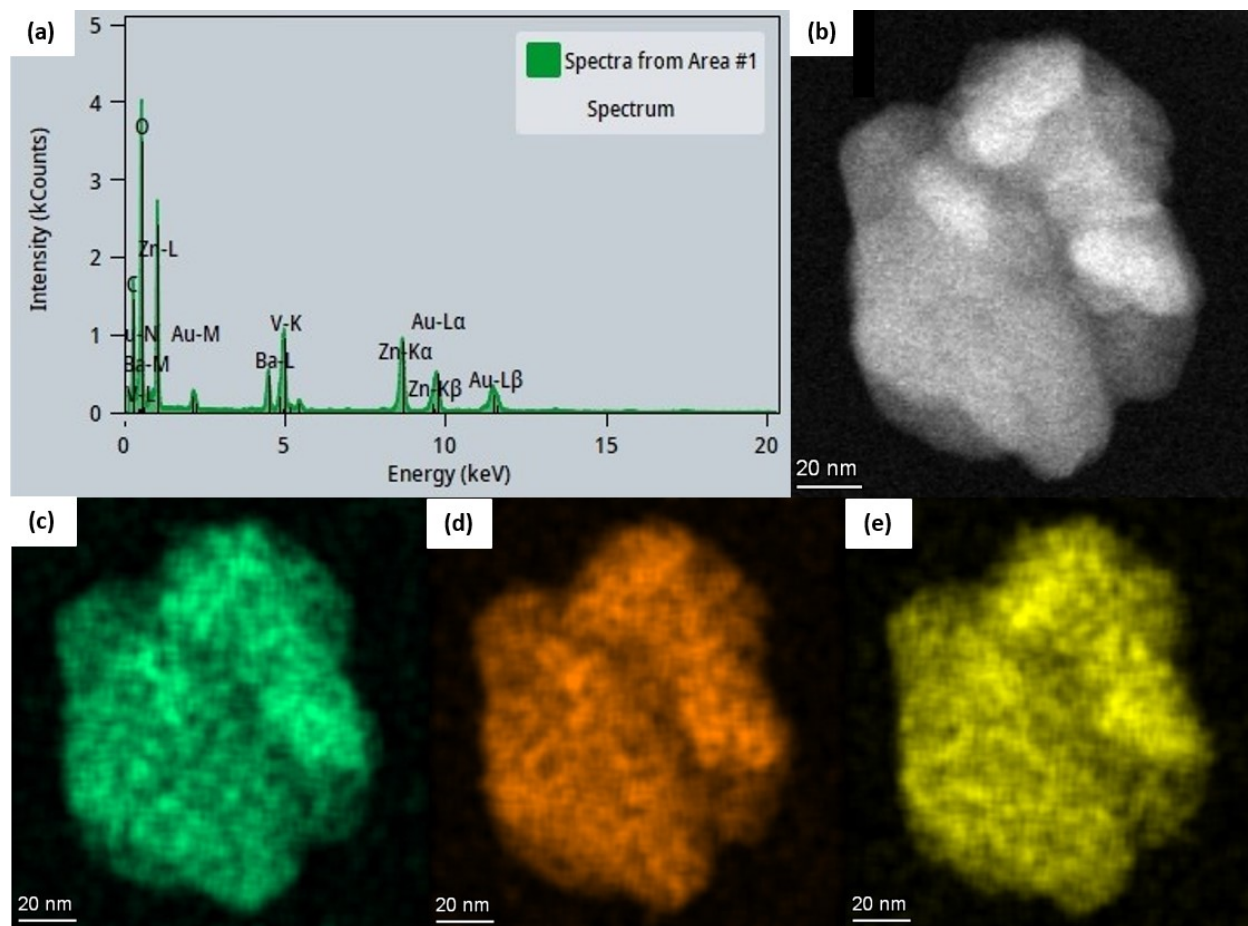

**Figure S7.** (a) EDS spectrum of the chosen particle of **BaZn<sub>3</sub> NPs-7h** displayed in (b). (c,d,e) EDS mapping analysis of Ba, Zn and V elements, respectively.

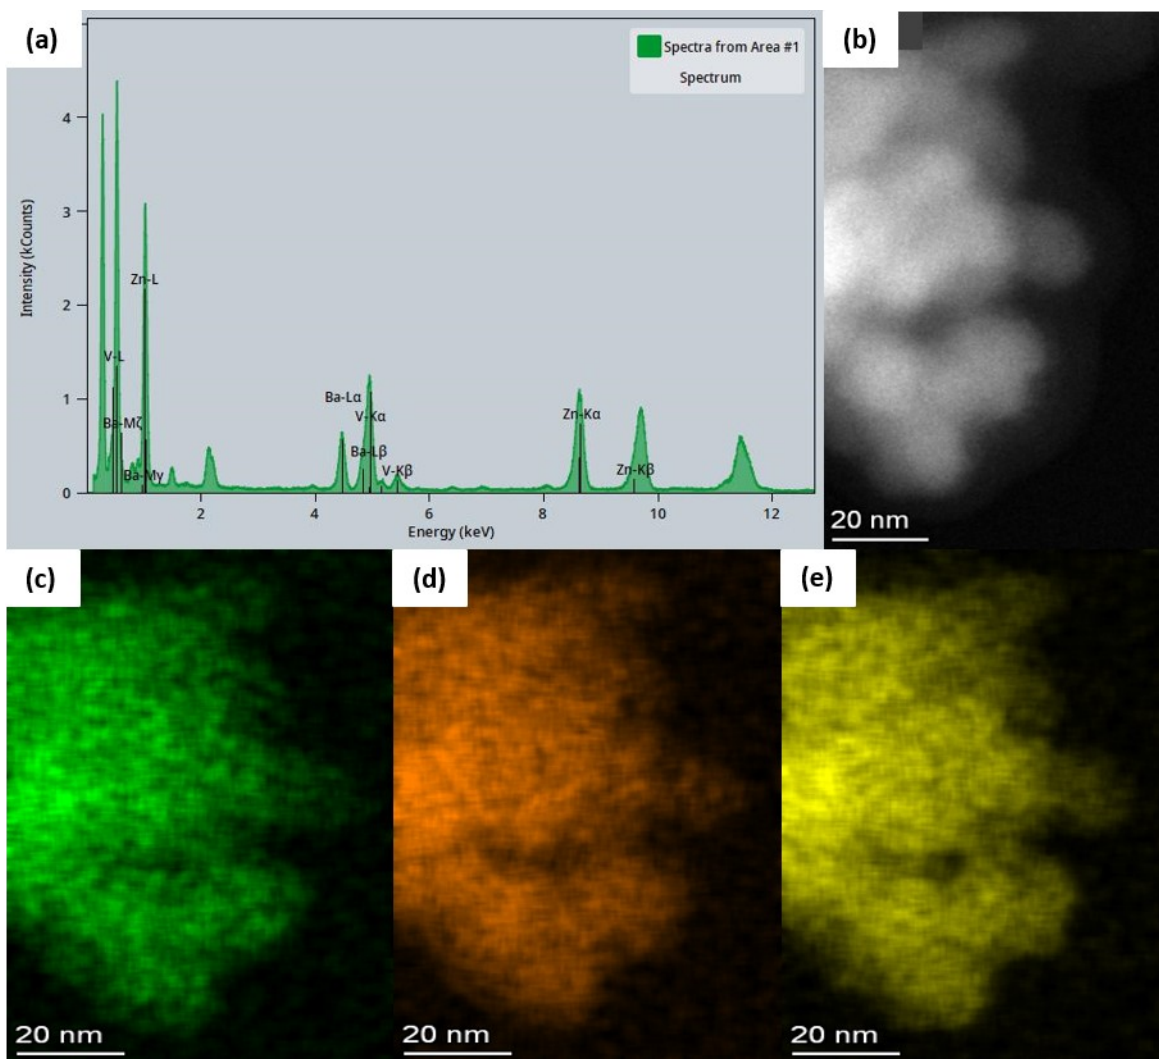

**Figure S8.** (a) EDS spectrum of the chosen particle of **BaZn<sub>3</sub> NPs-25min** displayed in (b). (c,d,e) EDS mapping analysis of Ba, Zn and V elements, respectively.
